# Supplementary material for: Exploring the heterogeneity of human exposure to malaria vectors in an urban setting, Bouaké, Côte d’Ivoire, using an immuno-epidemiological biomarker
Source: Springer Nature journal article supplement (doi:10.1186/s12936-019-2696-z), 2019-03-11
Supplement: MOESM1 [file 16538448]

## Additional file 1

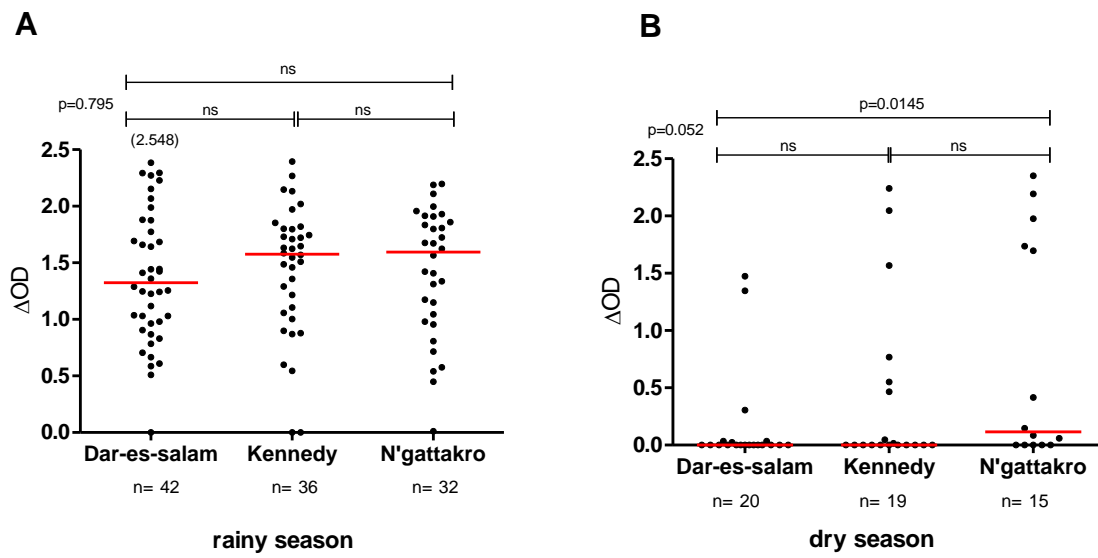

*IgG levels to gSG6-P1 peptide of children under 5 years according districts.*

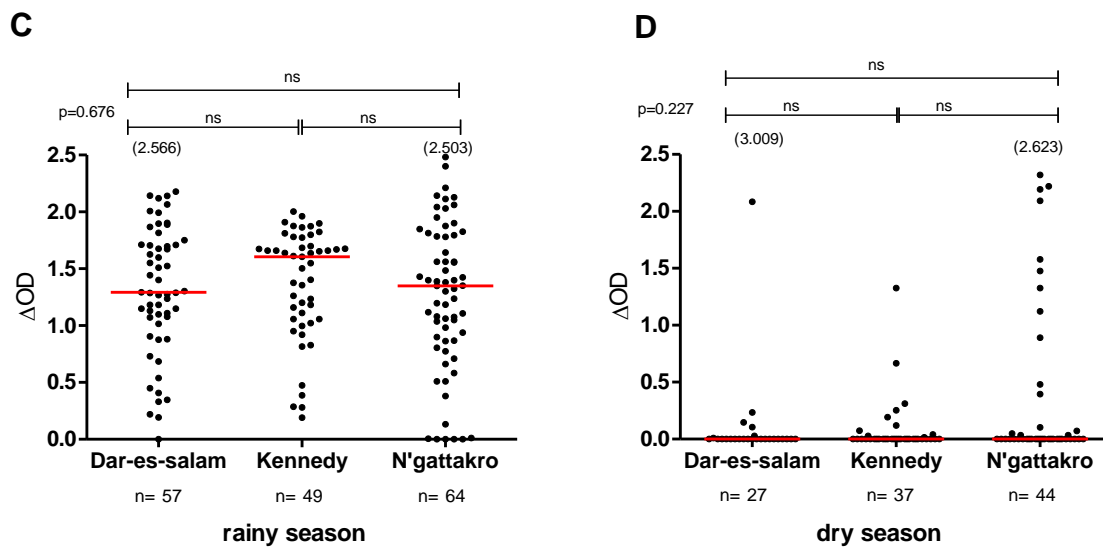

*IgG levels to gSG6-P1 peptide of children over 5 years according districts.*
