# Supplementary material for: Exploring the heterogeneity of human exposure to malaria vectors in an urban setting, Bouaké, Côte d’Ivoire, using an immuno-epidemiological biomarker
Source: Springer Nature journal article supplement (doi:10.1186/s12936-019-2696-z), 2019-03-11
Supplement: MOESM2 [file 16538448]

Additional file 2

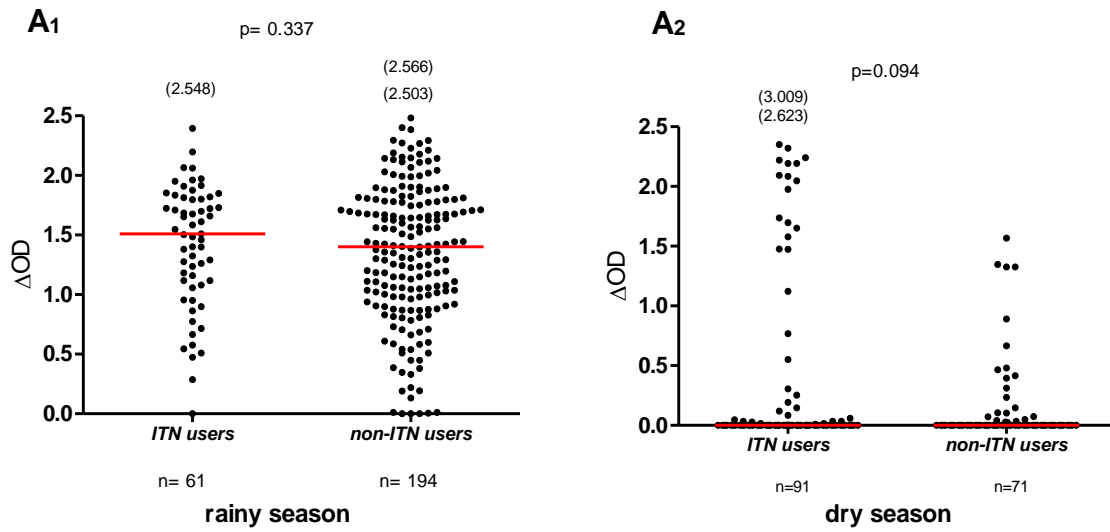

Figure A: IgG level to gSG6-P1 peptide in the whole population according to the use of insecticide-treated nets (ITN)

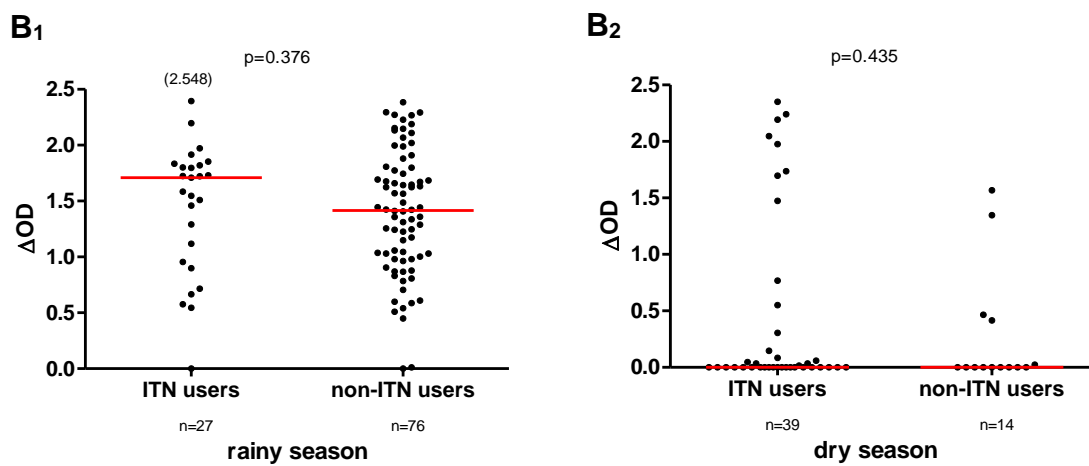

Figure B: IgG level to gSG6-P1 peptide to children under 5 years according to the use of insecticide-treated nets (ITN)

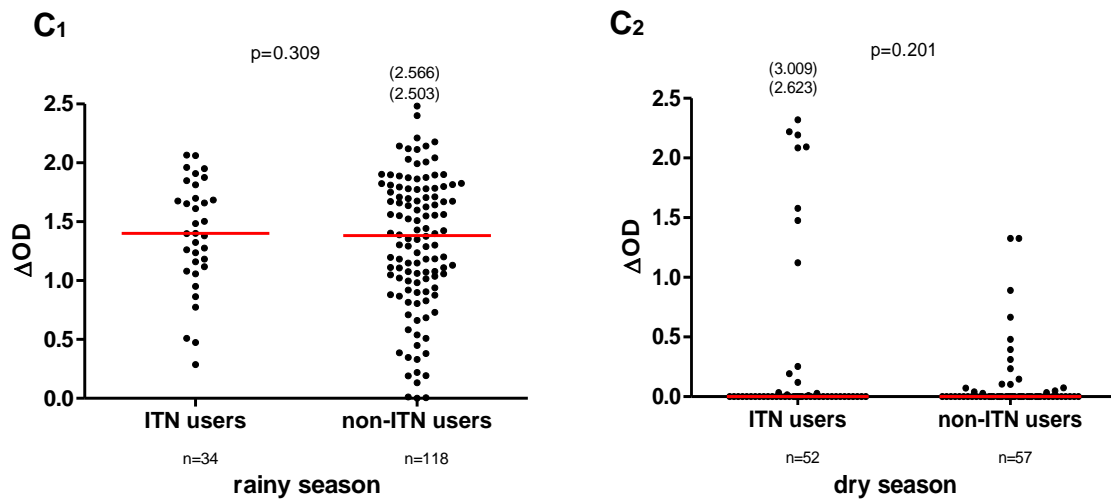

**Figure C:** *IgG level to gSG6-P1 peptide to children over 5 years according to the use of insecticide-treated nets (ITN)*
